# Supplementary material for: TRPM7-like channels are functionally expressed in oocytes and modulate post-fertilization embryo development in mouse
Source: PubMed Central journal article supplement (PMC5041074; doi:10.1038/srep34236), 2016-09-29
Supplement: srep34236-s1.pdf [file srep34236-s1.pdf]

**TRPM7-like channels are functionally expressed in oocytes and modulate post-fertilization embryo development in mouse**

Ingrid Carvacho<sup>1,2,3\*</sup>, Goli Ardestani<sup>4</sup>, Hoi Chang Lee<sup>4</sup>, Kaitlyn McGarvey<sup>4</sup>, Rafael A. Fissore<sup>4</sup> and Karin Lykke-Hartmann<sup>1,2,5\*</sup>

<sup>1</sup>Department of Biomedicine, Aarhus University, DK-8000 Aarhus C, Denmark.

<sup>2</sup>Centre for Membrane Pumps in Cells and Disease-PUMPKIN, Danish National Research Foundation, Aarhus University, Department of Molecular Biology and Genetics, DK-8000 Aarhus C, Denmark.

<sup>3</sup>Department of Biology and Chemistry, Faculty of Basic Sciences, Universidad Católica del Maule, 3480112 Talca, Chile.

<sup>4</sup>Department of Veterinary and Animal Sciences, University of Massachusetts, Amherst, MA 01003, USA.

<sup>5</sup>Aarhus Institute of Advanced Studies (AIAS), Aarhus University, DK-8000 Aarhus C, Denmark

\* Co-corresponding authors: Ingrid Carvacho, [icarvacho@biomed.au.dk](mailto:icarvacho@biomed.au.dk), phone: +45-87167258, and Karin Lykke-Hartmann, [kly@biomed.au.dk](mailto:kly@biomed.au.dk), phone: +45-29390558.

# Supplementary Figure S1.

## a. MII eggs

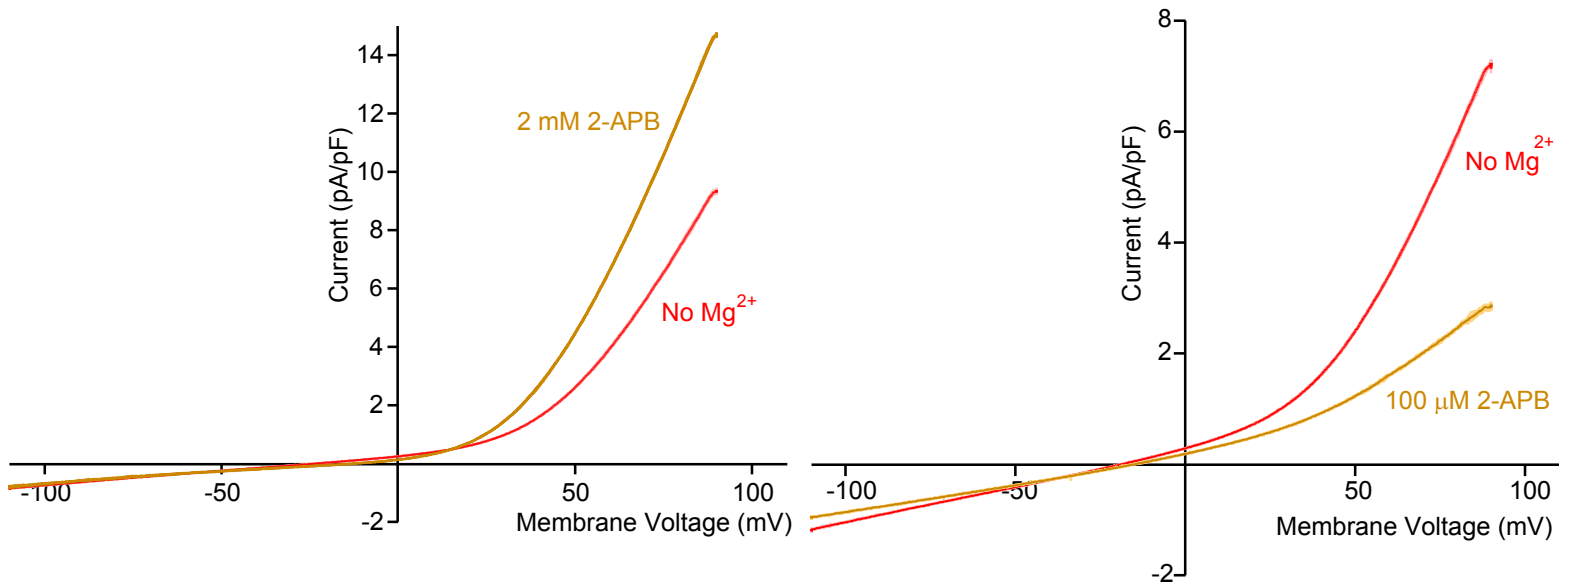

**Figure S1. Modulation of native TRPM7 current by 2-APB in MII eggs. a.** Whole-cell voltage clamp recordings from MII eggs. Current evoked from a voltage ramp from -100 to +100 mV. *Left panel.* 2-APB 2 mM increased the TRPM7-like current in MII eggs (n=5). *Right panel.* 2-APB 100 μM blocked TRPM7 current (n=4).

## Supplementary Figure S2.

### 2-cell blastomeres

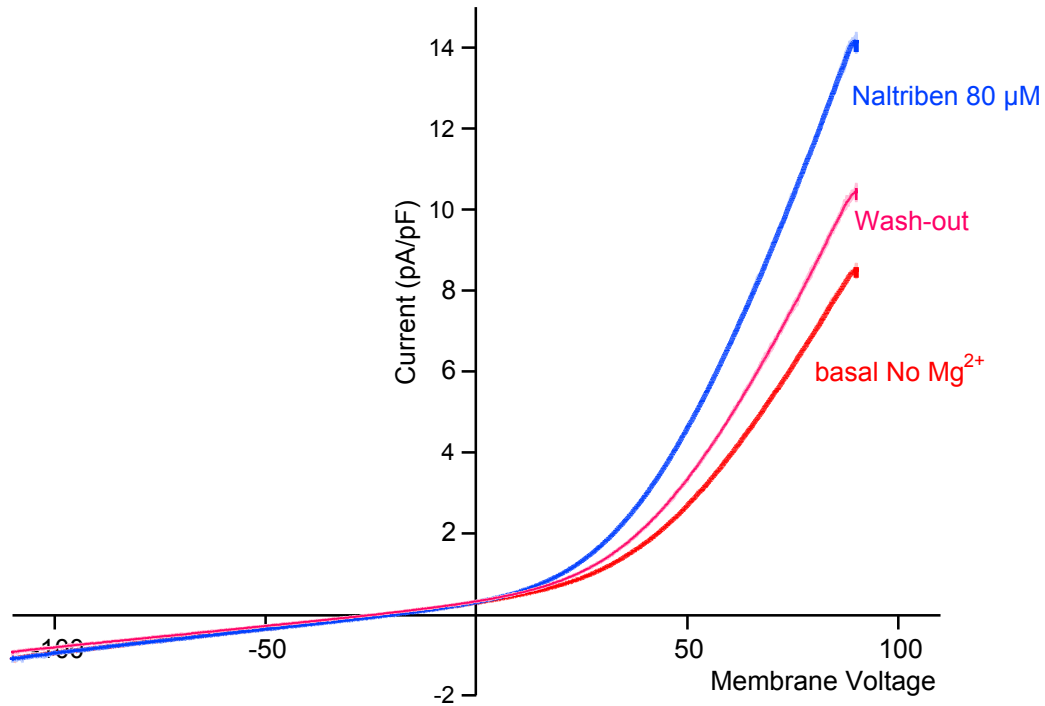

**Figure S2. Naltriben potentiates TRPM7-like currents in 2-cell blastomeres.** Whole-cell patch clamp recordings in blastomeres from 2-cell stage obtained after fertilization. Current evoked from a voltage ramp from -100 to +100 mV in basal conditions (red trace, basal No Mg<sup>2+</sup>), presence of 80 μM Naltriben (blue trace) and after Naltriben wash-out (pink trace). n=3.

**Supplementary Table S1. Apamin does not inhibit pre-implantation embryo development.**

| <b>Treatment</b>    | <b># of 2<sup>nd</sup> PB/2 PN<sup>a</sup></b> | <b># of 2 cell (%)<sup>b</sup></b> | <b># of 4 cell (%)</b> | <b># of 8 cell (%)</b> | <b># Blastocysts(%)</b> |
|---------------------|------------------------------------------------|------------------------------------|------------------------|------------------------|-------------------------|
| Control             | 15                                             | 11 (73)                            | 11 (100)               | 11 (100)               | 9 (81)                  |
| Apamin – 1 $\mu$ M  | 26                                             | 17 (65)                            | 17 (100)               | 16 (94)                | 14 (82)                 |
| Apamin – 10 $\mu$ M | 8                                              | 7 (88)                             | 7 (100)                | 7 (100)                | 6 (86)                  |

<sup>a</sup> Zygotes were collected 15 h post hCG. One replicate. PB: Polar Body, PN: Pro-Nucleus.

<sup>b</sup> 2-cell embryos were evaluated 24 h post-collection, 4-cell embryos at 48 h, 8-cell embryos at 72 h, and blastocysts at 96 h.

**Supplementary Table S2. NS8593 delays pre-implantation embryo development to the blastocysts stage of mouse *Trpv3*<sup>-/-</sup> zygotes.**

| <b>Time of observation</b> |                    | <b>24-h</b>                  | <b>48-h</b>   | <b>60-h</b>   |              | <b>72-h</b>  |                | <b>96-h</b>     |
|----------------------------|--------------------|------------------------------|---------------|---------------|--------------|--------------|----------------|-----------------|
| <b>Treatment</b>           | # 2PN <sup>a</sup> | # 2-cells - (%) <sup>b</sup> | # 4-cells (%) | # 8-cells (%) | # Morula (%) | # Morula (%) | # Early BI (%) | Blastocysts (%) |
| Control                    | 22                 | 22 (100)                     | 22 (100)      | 11 (50)       | 11 (50)      | 12 (50)      | 10 (45)        | 22 (100%)       |
| NS8593-10 $\mu$ M          | 25                 | 25 (100)                     | 24 (96)       | 21 (88)       | 0 (0)        | 20 (95)      | 0 (0)          | 20 (80%)        |

<sup>a</sup> Zygotes were collected 20 h post hCG. Two replicates. PN: Pro-Nucleus.

<sup>b</sup> Time of observation to determine cleavage are indicated on top of each column.

**Supplementary Table S3. Waixenicin A negatively affects oocyte viability during *in-vitro* maturation.**

| <b>Treatment</b>          | <b># of GVs<sup>a</sup></b> | <b>GVBD<sup>b</sup>(%)</b> | <b>MII (%)</b> |
|---------------------------|-----------------------------|----------------------------|----------------|
| Control                   | 35                          | 33 (94.2%)                 | 33 (94.2%)     |
| Waixenicin A <sup>c</sup> | 63                          | 41 (65%)                   | 0 (0.0%)       |

<sup>a</sup>GV oocytes were collected 48h post PMSG. Three replicates. <sup>b</sup>GVBD: Germinal Vesicle Break Down, MII: Metaphase II eggs. GVBD was evaluated 2 h post initiation of maturation and MII eggs were observed at 12 h post initiation of maturation. Oocytes in the treatment group that failed to undergo GVBD or reached the MII stage lysed and degenerated during culture. <sup>c</sup>Waixenicin A was used at 1  $\mu$ M concentration, which is the minimal concentration required to prevent/reduce  $[Ca^{2+}]_i$  oscillations in GV oocytes.
